# Supplementary material for: Application of the Ridden Horse Pain Ethogram to 150 Horses with Musculoskeletal Pain before and after Diagnostic Anaesthesia
Source: MDPI journal article supplement (doi:10.3390/ani13121940), 2023-06-09
Supplement: s1 [file s1]

# Supplementary information

Table S1 Changes in frequency of occurrence of each of the 24 behaviours of the Ridden Horse Pain Ethogram (RHpE) in 150 horses undergoing investigation of poor performance before and after diagnostic anaesthesia ± saddle change. N=number, %= percentage.

| <b>RHpE behaviour</b>                              | <b>Before (N)</b> | <b>After (N)</b> | <b>Before (%)</b> | <b>After (%)</b> | <b>Difference (before - after %)</b> |
|----------------------------------------------------|-------------------|------------------|-------------------|------------------|--------------------------------------|
| Repeated changes of head position                  | 103               | 17               | 69                | 11               | 57.3                                 |
| Head tilted or tilting repeatedly                  | 105               | 24               | 70                | 16               | 54.0                                 |
| Head in front of vertical                          | 63                | 11               | 42                | 7                | 34.7                                 |
| Head behind vertical                               | 74                | 51               | 49                | 34               | 15.3                                 |
| Head position changes regularly                    | 54                | 6                | 36                | 4                | 32.0                                 |
| Ears rotated back behind vertical or flat          | 91                | 15               | 61                | 10               | 50.7                                 |
| Eye lids closed or half closed                     | 31                | 2                | 21                | 1                | 19.3                                 |
| Sclera (white of eye) exposed                      | 40                | 2                | 27                | 1                | 25.3                                 |
| Intense stare                                      | 128               | 37               | 85                | 25               | 60.7                                 |
| Mouth opening                                      | 77                | 16               | 51                | 11               | 40.7                                 |
| Tongue exposed                                     | 43                | 5                | 29                | 3                | 25.3                                 |
| Bit pulled through the mouth on one side           | 42                | 6                | 28                | 4                | 24.0                                 |
| Tail clamped tightly to middle or held to one side | 51                | 29               | 34                | 19               | 14.7                                 |
| Tail swishing large movements                      | 77                | 23               | 51                | 15               | 36.0                                 |
| A rushed gait                                      | 28                | 1                | 19                | 1                | 18.0                                 |
| Gait too slow                                      | 6                 | 0                | 4                 | 0                | 4.0                                  |
| Hindlimbs do not follow tracks of forelimbs        | 86                | 21               | 57                | 14               | 43.3                                 |
| Canter repeated leg changes                        | 21                | 1                | 14                | 1                | 13.3                                 |
| Spontaneous changes of gait                        | 71                | 11               | 47                | 7                | 40.0                                 |
| Stumbles or trips/catches toe repeatedly           | 96                | 45               | 64                | 30               | 34.0                                 |
| Sudden change of direction; spooking               | 22                | 2                | 15                | 1                | 13.3                                 |
| Reluctant to move forward, stops spontaneously     | 64                | 10               | 43                | 7                | 36.0                                 |
| Rearing                                            | 6                 | 0                | 4                 | 0                | 4.0                                  |
| Bucking or kicking backwards                       | 18                | 0                | 12                | 0                | 12.0                                 |
